# Supplementary material for: Method to Calculate the Electricity Generated by a Photovoltaic Cell, Based on Its Mathematical Model Simulations in MATLAB
Source: Hindawi journal article supplement (doi:10.1155/2015/545831), 2015-01-01
Supplement: f1 [file 545831.f1.pdf]



**JAPAY**  
Junta de Agua Potable y  
Alcantarillado de Yucatán  
Comprometidos con tu bienestar  
2012 - 2018



010371838000000012300 - 3

NOMBRE:  
**HERRERA ORTEGON MARIA LUISA**

DIRECCION CATASTRAL  
C. 38-A DIAG No. 278 X C. 0  
MÉRIDA  
FRACC SAN RAMON NORTE

DIRECCION FÍSICA  
C. 38-A DIAG No. 278 X C. 25 Y C. 25-A  
COL SAN RAMON NORTE  
MÉRIDA, YUCATÁN

CANTIDAD A PAGAR:  
**123.00**

FECHA LÍMITE:  
**INMEDIATO**

CONTRATO:  
**010371838**

|                     |                |                                                                                                                                                                                                                                                                                                                        |
|---------------------|----------------|------------------------------------------------------------------------------------------------------------------------------------------------------------------------------------------------------------------------------------------------------------------------------------------------------------------------|
| Meses de adeudo     | 2              | <p><b>GRACIAS</b></p> <p>A los usuarios que pagan puntualmente su servicio, las tarifas no se han modificado en los últimos años.</p> <p>Contamos con el servicio de domiciliación en tu hogar.</p>  <p>www.japay.yucatan.gob.mx</p> |
| Localización        | 745 - 27 - 141 |                                                                                                                                                                                                                                                                                                                        |
| No. Medidor         | 14018380       |                                                                                                                                                                                                                                                                                                                        |
| Fecha de expedición | 03/JUL/2015    |                                                                                                                                                                                                                                                                                                                        |
| Folio del recibo    | 10240974       |                                                                                                                                                                                                                                                                                                                        |

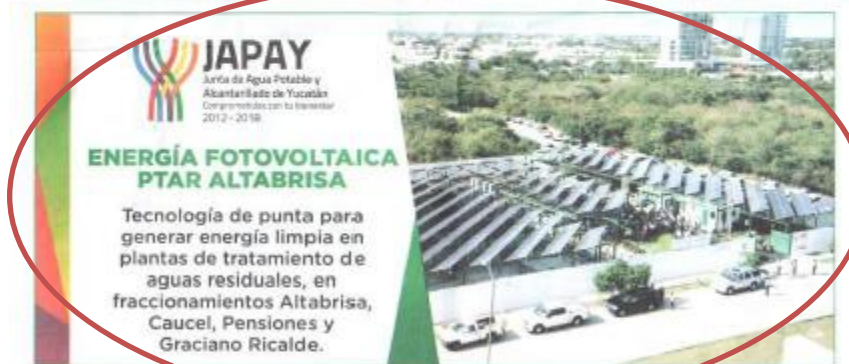



**JAPAY**  
Junta de Agua Potable y  
Alcantarillado de Yucatán  
Comprometidos con tu bienestar  
2012 - 2018



010371838000000012300 - 3

NOMBRE DEL USUARIO:  
**HERRERA ORTEGON MARIA LUISA**

**TALÓN DE CAJA**

|                                         |                                   |                               |
|-----------------------------------------|-----------------------------------|-------------------------------|
| CANTIDAD A PAGAR:<br><b>123.00</b>      | FECHA LÍMITE:<br><b>INMEDIATO</b> | CONTRATO:<br><b>010371838</b> |
| (CIENTO VEINTITRÉS PESOS 00 / 100 M.N.) |                                   |                               |

|                                |                                      |                                                 |
|--------------------------------|--------------------------------------|-------------------------------------------------|
| Localización<br>745 - 27 - 141 | Tipo de servicio<br>DOMESTICO ZONA 3 | Periodo de consumo<br>11/Mar/2015 - 13/May/2015 |
| Folio del recibo<br>10240974   |                                      |                                                 |

We attach an example of invoice of drinking water company (JAPAY) where they present one of its photovoltaic facilities in one of its four Sewage Treatment Plants in Merida Yucatan Mexico. The proposed method was used to estimate the electricity generation of these four PV systems.
